# Supplementary material
Source: PubMed Central journal article supplement (PMC10286854)
Supplement: NIHMS1808865-supplement-Supplementary_Material.pdf [file NIHMS1808865-supplement-Supplementary_Material.pdf]

## **Supplemental Materials and Methods**

### **Pathological analysis and immunohistochemistry (IHC) staining**

Tissue samples harvested from PDX mice were fixed in 4% paraformaldehyde. The fixed tissues were embedded in paraffin, cut into slices, deparaffinized, and stained with hematoxylin and eosin (H&E) or optimal concentrations of mono- or poly-clonal antibodies against human CD3, CD4, CD8, CD7, CD26. For IHC, in brief, after deparaffinization, sections were soaked in target retrieval-buffered saline (Tris, pH 6.1) and soaked in a 3% H<sub>2</sub>O<sub>2</sub> methanol solution. Sections were blocked with 5% BSA in Tris-buffered saline and incubated with primary antibodies for more than one hour under intermittent microwave irradiation. After washing with Tris-buffered saline containing 1% Tween 20 (TBS-T), specimens were incubated with peroxidase-conjugated (Envision System) or alkaline phosphatase-conjugated secondary antibodies (Simple Stain System) for more than 1 hour under intermittent microwave irradiation. After washing with TBS-T, sections were immersed in 3,3'-diaminobenzidine (DAB) (Vector) and washed with running water. The stained slides were evaluated by a pathologist using a light microscope.

### **Flow cytometry**

Primary tumor cells harvested from the spleens of PDX mice were washed in PBS and resuspended in cell staining buffer (Biolegend).  $1 \times 10^5$  cells were incubated with Fc receptor blocking solution (Biolegend) for 15 minutes at 4°C. The cells were then stained with cocktails containing combinations of fluorochrome conjugated monoclonal antibodies against cell surface markers CD3, CD4, CD8, CD7, CD26 (Biolegend) in the dark for 30 minutes at 4°C. After staining, the cells were washed with PBS containing 0.2% FBS and resuspended in cell staining buffer. A BD FACS Aria 3 Cell Sorter (BD Immunocytometry Systems) was used to acquire data that were analyzed by FlowJo software (Tree Star).

### **Western blotting**

$1 \times 10^6$  H9 cells were cultured at 37°C for 2 hours before stimulation and drug treatment. The cells were then stimulated with  $\alpha$ -CD3 (1  $\mu$ g/mL) and  $\alpha$ -CD28 (0.5  $\mu$ g/mL) antibody for 15

minutes before adding BKM120, at varying concentrations. After 30 minutes of drug treatment, the cells were harvested and lysed with a buffer containing 10% NP40, 10% TNE (50 mM Tris, 150 mM NaCl, 0.5 mM EDTA), dithiothreitol, cocktail protease and phosphatase inhibitors (Thermo Fisher Scientific) to generate lysates. A total amount of 60 µg protein lysates were separated using NuPAGE Novex Bis-Tris gels (Invitrogen) and then transferred to a nitrocellulose membrane using an iBlot transfer apparatus (Invitrogen). Membranes were probed with primary antibodies (Cell Signaling Technology) overnight at 4°C. Anti-pAkt (Ser473), anti-Akt, anti-p4EBP1 (Thr37/46), anti-4EBP1, anti-GAPDH were 1:1000 diluted. Protein-antibody complexes were detected using anti-rabbit IRDye 800 or anti-mouse IRDye 700 molecular probes (LI-COR Biosciences) and visualized with a LI-COR Odyssey infrared imaging system (LI-COR Biosciences). Immunoblot data were analyzed using the Odyssey application software v3.0.30.

### **TaqMan Gene Expression Assay**

Total cellular RNA was extracted using the NucleoSpin RNA/Protein kit (Macherey-Nagel) according to the manufacturer's instruction. Complementary DNA (cDNA) for each sample was produced via reverse transcription using 2 µg of total RNA using the High Capacity cDNA Reverse Transcription Kit (Applied Biosystems). Quantitative RealTime-PCR was performed using the TaqMan Gene Expression Assay (Applied Biosystems) with transcript-specific TaqMan primers (PIK3CA, Hs00907957\_m1; PIK3CB, Hs00927728\_m1; PIK3CD, Hs00192399\_m1; PIK3CG, Hs00932390\_m1) and endogenous control (GAPDH, Hs02786624\_g1). The assays were performed according to the manufacturer's guidelines.

# Figure S1

a

| Pathway              | Drug                     | Pathway          | Drug         |
|----------------------|--------------------------|------------------|--------------|
| Akt                  | GSK690693                | JAK              | Ruxolitinib  |
|                      | MK-2206                  | JAK2             | SAR-302503   |
|                      | CCT128930                | JNK1/2/3         | SP600125     |
| Akt/PI3K             | Perifosine               | KSP              | SB 743921    |
| ALK                  | SB 431542                | MDM2             | Nutlin-3     |
|                      | NVP-TAE684               | MEK1/2           | CI-1040      |
| ALK/c-Met            | PF-2341066               |                  | AZD6244      |
| ATM                  | KU-55933                 |                  | PD0325901    |
| Aurora B             | AZD1152-HQPA             | mTORC            | PP242        |
| Aurora Kinase        | VX-680                   |                  | Everolimus   |
| Bcl-2/Bcl-xL         | ABT-263                  |                  | KU-0063794   |
| BCR/ABL/Src          | Dasatinib                | p53              | JNJ 26854165 |
| BMP                  | LDN193189                | pan-PI3K         | BKM120       |
| B-Raf                | PLX-4032                 |                  | LY294002     |
|                      | PLX-4720                 |                  | PIK-90       |
| BTK                  | Ibrutinib                |                  | XL147        |
| CDK1/2/4             | Flavopiridol             | PI3K p110a       | GDC-0941     |
| CDK2/7/9             | SNS-032                  |                  | A66          |
| CDK4/6               | PD0332991                |                  | PIK-75 HCL   |
| Chemo                | Cisplatin                | PI3K p110β       | TGX-221      |
|                      | Bendamustine             | PARP1/2          | ABT-888      |
|                      | Adriamycin (Doxorubicin) |                  | AZD2281      |
|                      | Cytarabine               | PI3K/mTOR1/2     | XL765        |
|                      | Paclitaxel               |                  | BEZ-235 #1   |
|                      | Gemcitabine hcl          |                  | BEZ-235 #2   |
| CHK1                 | LY2603618                | Pim              | SGI-1776     |
| CHK1/2               | AZD-7762                 | PKCK2            | CX-4945      |
| c-Kit/VEGFR2         | OSI-930                  | PKCβ             | Enzastaurin  |
| c-Met                | SU11274                  | PLK1             | BI 6727      |
|                      | JNJ 38877605             |                  | BI 2536      |
| COX-2                | OSU-03012                | Proteasome       | MG132        |
| c-Src                | AZD0530                  |                  | Bortezomib   |
| CYP17                | Abiraterone              | ROCK             | Fasudil hcl  |
| DNA-PK/PI3K/mTOR     | PI-103                   |                  | GSK429286A   |
| Farnesyltransferase  | Tipifarnib               | RTK              | Imatinib     |
| FLT3                 | Tandutinib               |                  | MP-470       |
|                      | AC-220                   |                  | Sunitinib    |
| Gamma Secretase (GS) | RO4929097                | Smo              | LDE225       |
| GSK-3                | SB 216763                | STAT3            | S31-201      |
|                      | CHIR-99021               | Survivin         | YM155        |
| HDAC                 | Vorinostat               | Syk              | R935788      |
|                      | Trichostatin A           | Tankyrase 1/2    | XAV-939      |
|                      | LBH589                   | TGF-BR           | LY2157299    |
|                      | Romidepsin               | TNF-α            | Pomalidomide |
| Hedgehog             | Cyclopamine              | Topoisomerase II | Etoposide    |
|                      | GDC-0449                 | Wee1             | MK-1775      |
| Hsp90                | 17-AAG                   |                  |              |
|                      | BIIB021                  |                  |              |

b

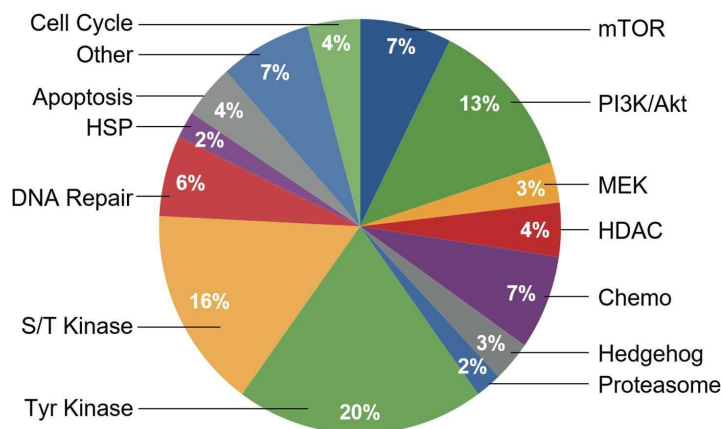

**Figure S1. The agents and the targeted pathways in the drug library.**

List of the drug library of 94 compounds used in our high-throughput screen and its targeted molecular pathways relevant to cancer biology.

## Figure S2

**a**

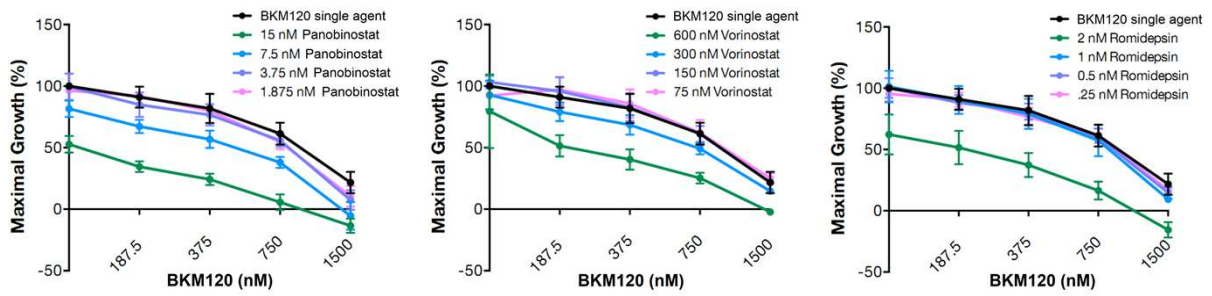

**b**

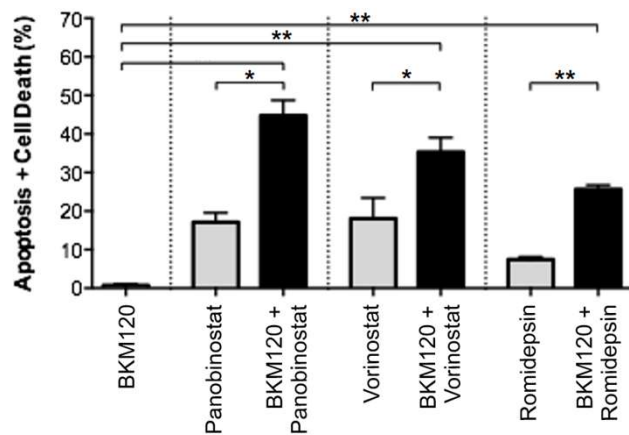

**Figure S2.** BKM120 (1500 nM) potentiates the (a) anti-proliferation and (b) apoptosis induction activities of three HDAC inhibitors: Panobinostat (15 nM), vorinostat (600 nM), and romidepsin (2 nM) in Hut78 cells. Data are presented as mean $\pm$ SEM and analyzed by an unpaired *t* test with two-tailed *P* values (\**P*<0.05, \*\**P*<0.01).

**Figure S3**

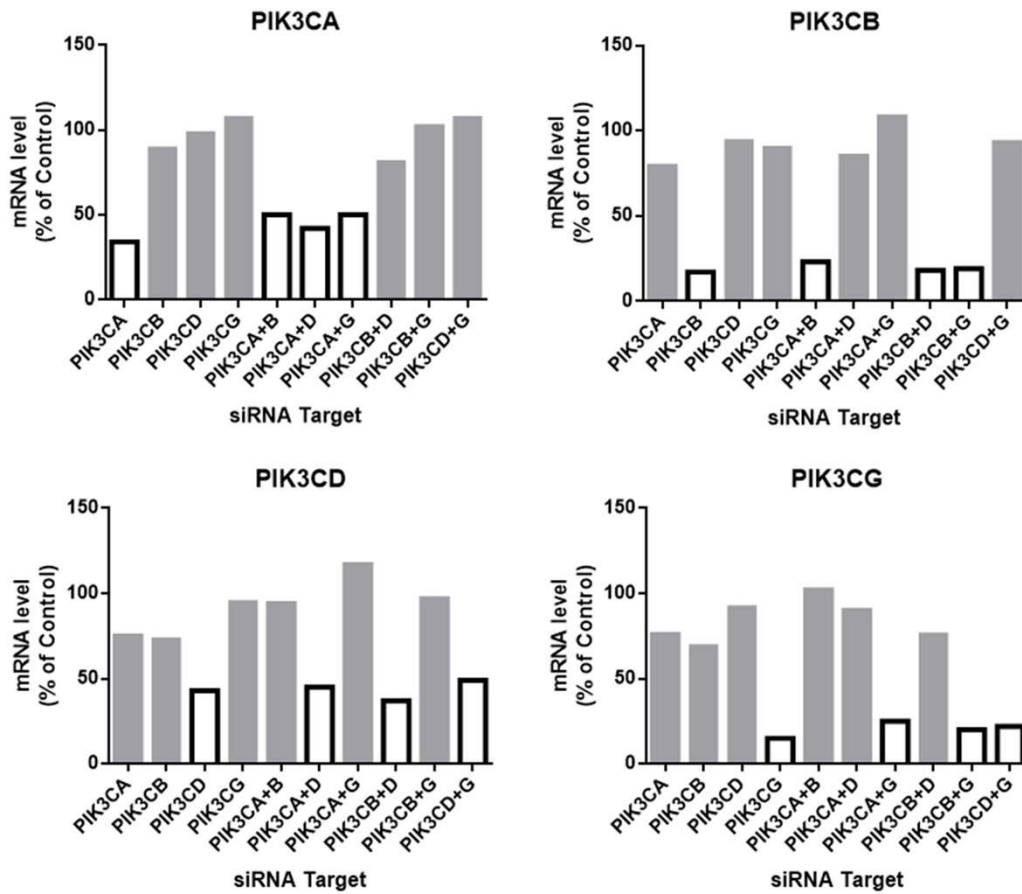

**Figure S3. The specificity of isoform-specific siRNA and their knock-down efficiency in CTCL cell line.** The mRNA levels of each siRNAs inhibited by its corresponding isoform alone or combination pair (open bar) and other isoforms or combination pair (grey bar).

**Figure S4**

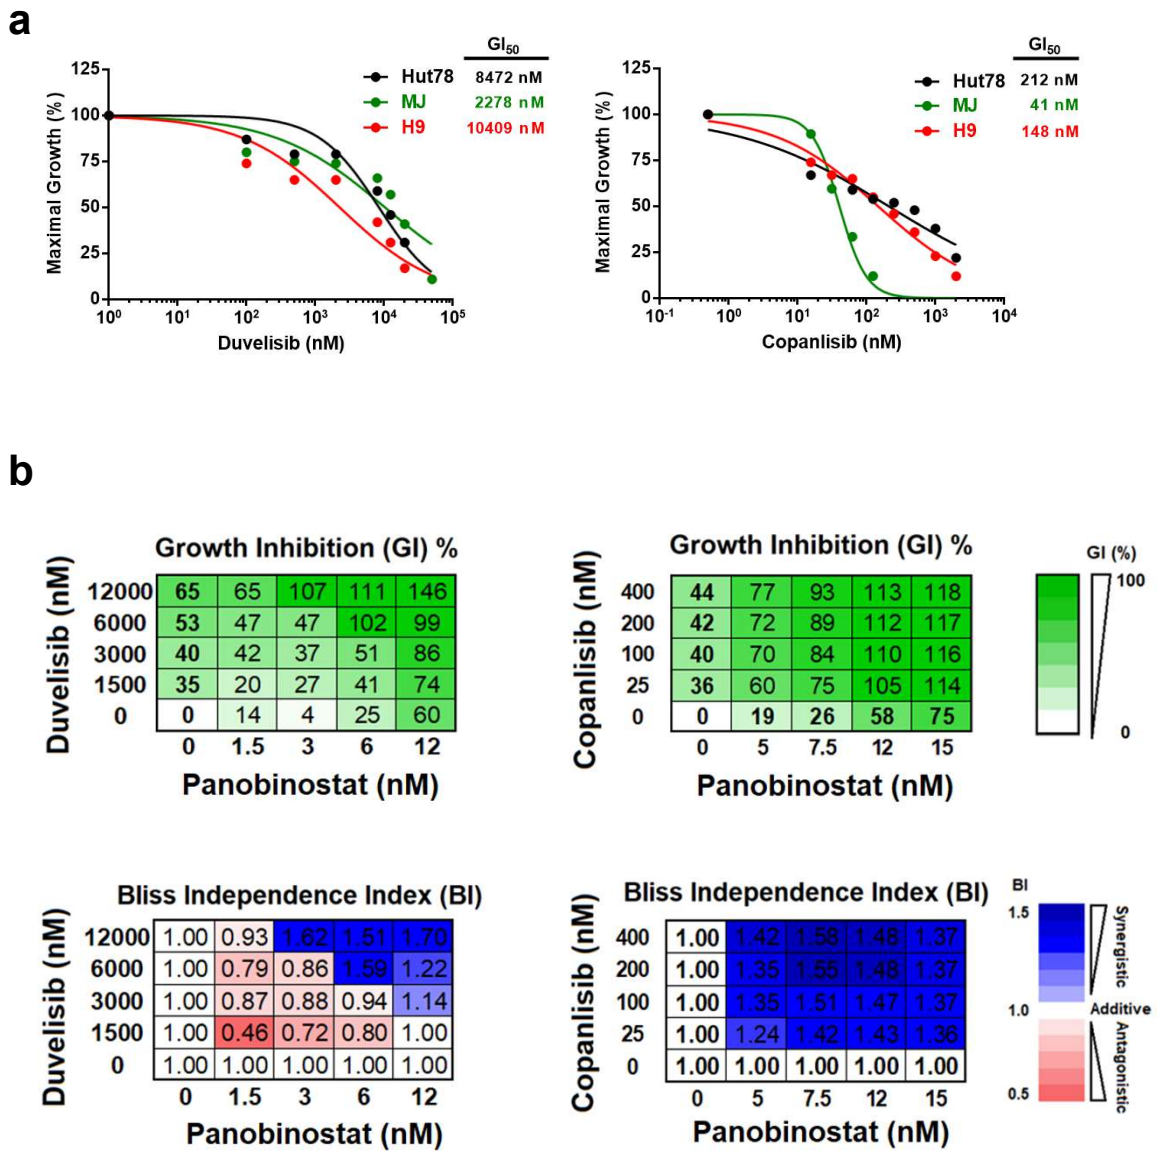

**Figure S4. Growth inhibition of duvelisib and copanlisib in CTCL cell lines.** (a) Growth inhibition of duvelisib and copanlisib in Hut78, MJ and H9 cell lines. (b) Growth inhibition and BI index of duvelisib and copanlisib in combination with panobinostat in Hut78 cell line.

**Table S1** Patient characteristics

| Patient   | PDX   | Diagnosis         | Stage     | Prior treatment | Specimen collection |
|-----------|-------|-------------------|-----------|-----------------|---------------------|
| Patient-1 | PRS-1 | Mycosis fungoides | Stage IIB | chlorambucil    | Lymph node FNA      |
| Patient-2 | PRS-2 | Sezary syndrome   | Stage IVA | none            | Blood               |
| Patient-3 | PRS-3 | Sezary syndrome   | Stage IVB | none            | Blood               |

**Table S2** Somatic mutations of genes in PRS-1, PRS-2, and PRS-3 identified in MF/SS patients.

| PRS-1   | Variant_Classification | Single Nucleotide Variation (SNV)-<br>encoded variations | Alteration_Frequency |
|---------|------------------------|----------------------------------------------------------|----------------------|
| ALPK2   | Silent                 | p.G1696=                                                 | 0.552                |
| CACNA1H | Missense_Mutation      | p.E45K                                                   | 0.625                |
| CNTRL   | Missense_Mutation      | p.S21C                                                   | 0.333                |
| CPQ     | Silent                 | p.G249=                                                  | 0.435                |
| DENND1A | Missense_Mutation      | p.S554F                                                  | 0.497                |
| DMXL1   | Missense_Mutation      | p.I72F                                                   | 0.800                |
| FAT4    | Missense_Mutation      | p.S4865F                                                 | 0.440                |
| HHIPL2  | Silent                 | p.Y117=                                                  | 0.516                |
| JAKMIP3 | Missense_Mutation      | p.R356C                                                  | 0.536                |
| KCNT2   | Missense_Mutation      | p.D396N                                                  | 0.333                |
| LAMC3   | Silent                 | p.D615=                                                  | 0.429                |
| MPDZ    | Missense_Mutation      | p.P1565L                                                 | 0.313                |
| NPHS1   | Missense_Mutation      | p.G269E                                                  | 0.986                |
| NRAS    | Missense_Mutation      | p.G13D                                                   | 0.500                |
| PCDH15  | Silent                 | p.P1141=                                                 | 0.463                |
| PCDHB10 | Missense_Mutation      | p.A515T                                                  | 0.309                |
| PCLO    | Splice_Region          |                                                          | 0.306                |
| PLCG1   | Missense_Mutation      | p.R48W                                                   | 0.424                |
| RARA    | Missense_Mutation      | p.R394Q                                                  | 0.200                |
| ROS1    | Silent                 | p.L1947=                                                 | 0.531                |
| SCN5A   | Silent                 | p.Y1409=                                                 | 0.412                |
| TP53BP1 | Missense_Mutation      | p.R1463H                                                 | 0.371                |
| UNC80   | Missense_Mutation      | p.S73F                                                   | 0.632                |



**Table S2** Somatic mutations of genes in PRS-1, PRS-2, and PRS-3 identified in MF/SS patients. (Continue)

| <b>PRS-2</b> | Variant_Classification | Single Nucleotide Variation (SNV)-<br>encoded variations | Alteration_Frequency |
|--------------|------------------------|----------------------------------------------------------|----------------------|
| CTXN3        | Missense_Mutation      | p.L44F                                                   | 0.444                |
| DNER         | Missense_Mutation      | p.S638F                                                  | 0.379                |
| DSG1         | Missense_Mutation      | p.G817V                                                  | 0.386                |
| EDN3         | Silent                 | p.T98=                                                   | 0.481                |
| EPG5         | Missense_Mutation      | p.V790L                                                  | 0.667                |
| FTMT         | Missense_Mutation      | p.G209S                                                  | 0.462                |
| KL           | Missense_Mutation      | p.T686M                                                  | 0.517                |
| KMT2D        | Silent                 | p.E1904=                                                 | 0.346                |
| L3MBTL4      | Missense_Mutation      | p.P44L                                                   | 0.583                |
| LRRN4CL      | Missense_Mutation      | p.P178S                                                  | 0.374                |
| PRDM16       | Splice_Region          |                                                          | 0.425                |
| PRMT8        | Missense_Mutation      | p.V339I                                                  | 0.380                |
| ROBO1        | Missense_Mutation      | p.S836F                                                  | 0.273                |
| SFTPA2       | Silent                 | p.V164=                                                  | 0.350                |
| SPHKAP       | Missense_Mutation      | p.L1037P                                                 | 0.341                |
| STAB1        | Missense_Mutation      | p.P538S                                                  | 0.416                |
| STAT5A       | Missense_Mutation      | p.A497V                                                  | 0.021                |
| STK19        | Missense_Mutation      | p.T183I                                                  | 0.338                |
| TP53         | Splice_Region          |                                                          | 0.976                |
| TTBK1        | Missense_Mutation      | p.R407Q                                                  | 0.372                |
| ZDBF2        | Missense_Mutation      | p.S1787F                                                 | 0.429                |

**Table S2** Somatic mutations of genes in PRS-1, PRS-2, and PRS-3 identified in MF/SS patients. (Continue)

| <b>PRS-3</b> | <b>Variant_Classification</b> | <b>Single Nucleotide Variation (SNV)-encoded variations</b> | <b>Alteration_Frequency</b> |
|--------------|-------------------------------|-------------------------------------------------------------|-----------------------------|
| ARHGEF17     | Missense_Mutation             | p.P713S                                                     | 0.366                       |
| BNC2         | Missense_Mutation             | p.R444H, p.R391H, p.R486H                                   | 0.335                       |
| BRCA2        | Missense_Mutation             | p.D420N                                                     | 0.438                       |
| CD3E         | Missense_Mutation             | p.S39C                                                      | 0.426                       |
| FAT3         | Missense_Mutation             | p.L783F                                                     | 0.524                       |
| FAT4         | Missense_Mutation             | p.V1670I, p.V1670I, p.V1670I                                | 0.461                       |
| HMCN1        | Missense_Mutation             | p.S3257T                                                    | 0.501                       |
| PXDNL        | Missense_Mutation             | p.A863V                                                     | 0.327                       |
| RARA         | Missense_Mutation             | p.R179Q, p.R271Q, p.R276Q, p.R276Q                          | 0.119                       |
| TACC2        | Missense_Mutation             | p.G1422R, p.G1422R, p.G1422R                                | 0.700                       |
| ZNF608       | Missense_Mutation             | p.M1306T                                                    | 0.304                       |
